# Supplementary material for: Preparation of a Series of Photoresponsive Polymersomes Bearing Photocleavable a 2-nitrobenzyl Group at the Hydrophobic/Hydrophilic Interfaces and Their Payload Releasing Behaviors
Source: PubMed Central journal article supplement (PMC6724059; doi:10.3390/polym11081254), 2019-07-29
Supplement: polymers-11-01254-s001.pdf [file polymers-11-01254-s001.pdf]

Supplementary information for

**Preparation of a series of photoresponsive polymersomes bearing photocleavable a 2-nitrobenzyl group at the hydrophobic/hydro-philic interfaces and their payload releasing behaviors**

Shota Yamamoto <sup>1,2</sup>, Takafumi Yamada <sup>2</sup>, Genki Kubo <sup>3</sup>, Kazuo Sakurai <sup>3</sup>, Kazuo Yamaguchi <sup>2,\*</sup>  
and Jun Nakanishi <sup>1,4,\*</sup>

1 International Center for Materials Nanoarchitectonics (WPI-MANA), National Institute for Materials Science (NIMS), 1-1 Namiki, Tsukuba, Ibaraki 305-0044, Japan, E-mail: NAKANISHI.Jun@nims.go.jp

2 Department of Chemistry, Kanagawa University, 2946 Tsuchiya, Hiratsuka, Kanagawa 259-1293, Japan, E-mail: kazu@kanagawa-u.ac.jp

3 Department of Chemistry and Biochemistry, The University of Kitakyushu, 1-1 Hibikino, Wakamatsu-ku, Kitakyushu, Fukuoka 808-0135, Japan

4 Graduate School of Advanced Science and Engineering, Waseda University, 3-4-1 Okubo, Shinjuku-ku, Tokyo 169-8555, Japan

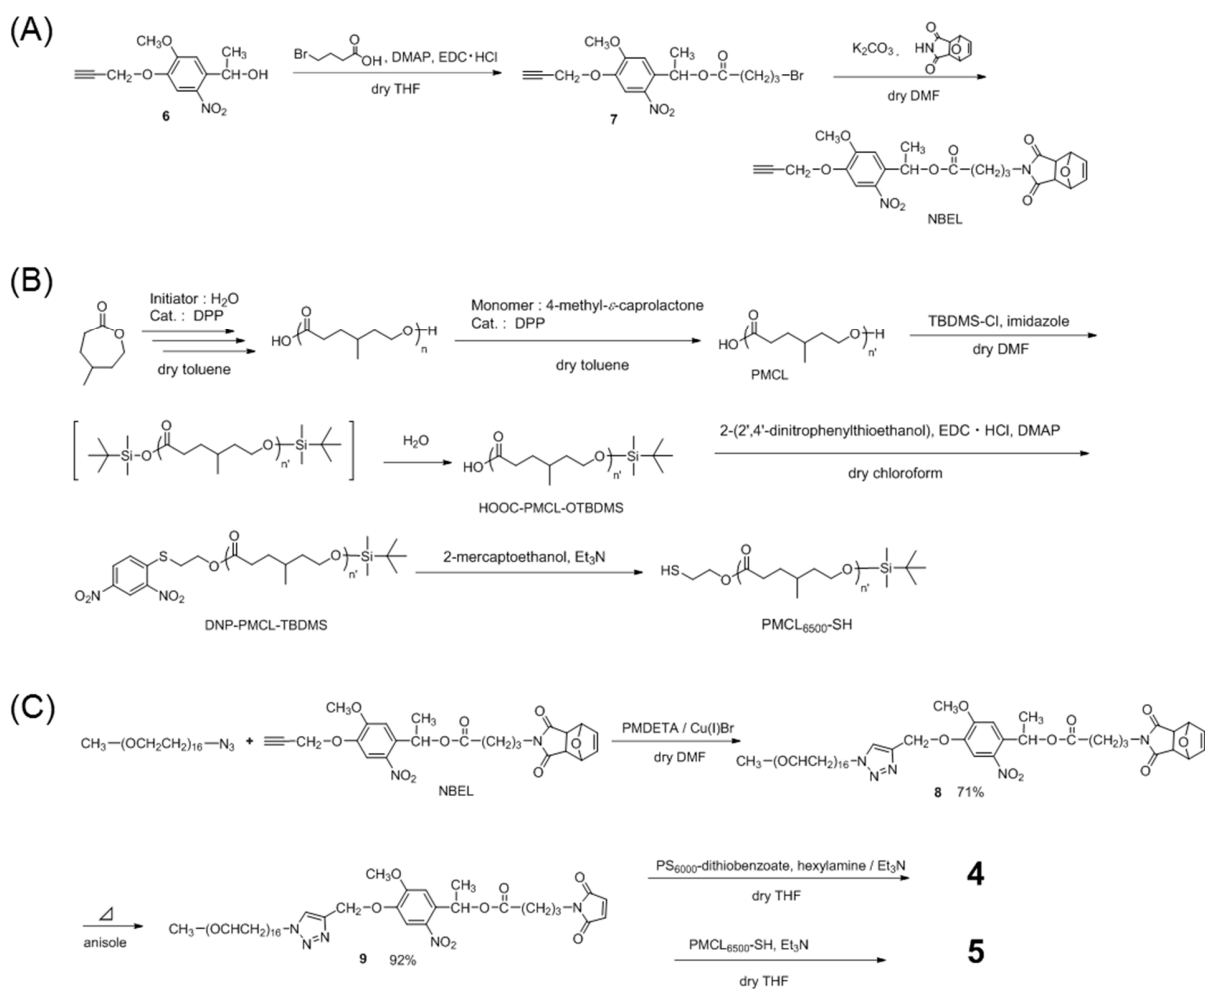

**Figure S1.** Synthetic routes of (A) NBEL, (B) thiol-terminated PMCL, and (C) photocleavable diblock copolymers **4** and **5**.

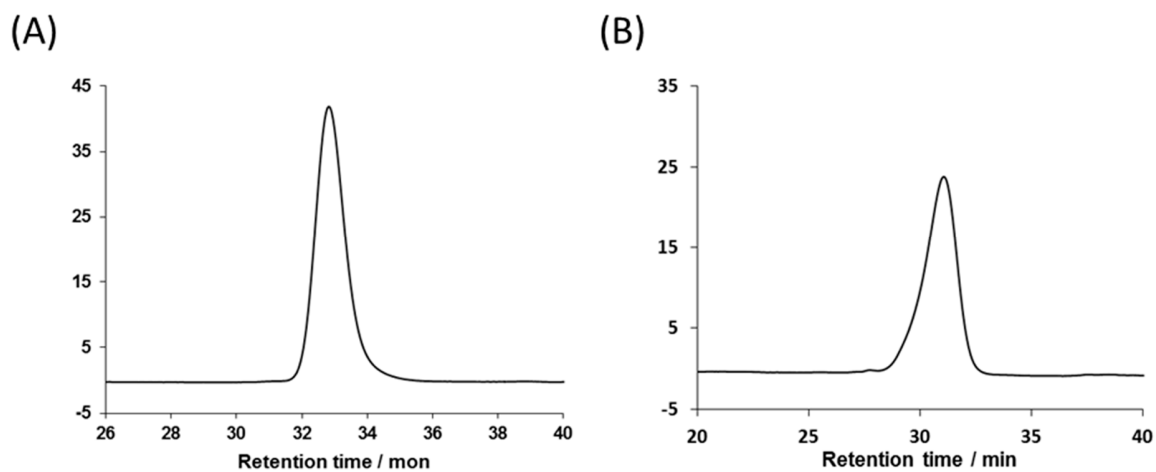

**Figure S2.** GPC charts of photocleavable diblock copolymer (A) **4** and (B) **5** with RI detection.

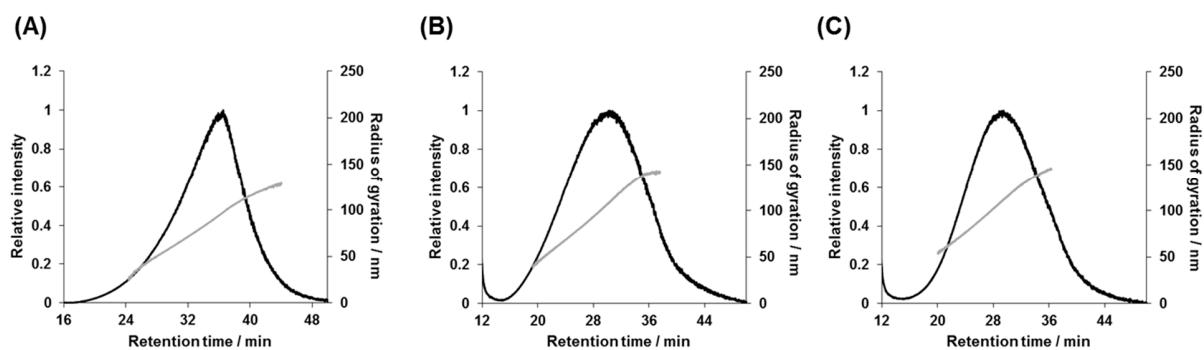

**Figure S3.** AF4 fractograms of polymersomes (A) **2**, (B) **3**, and (C) **5**.

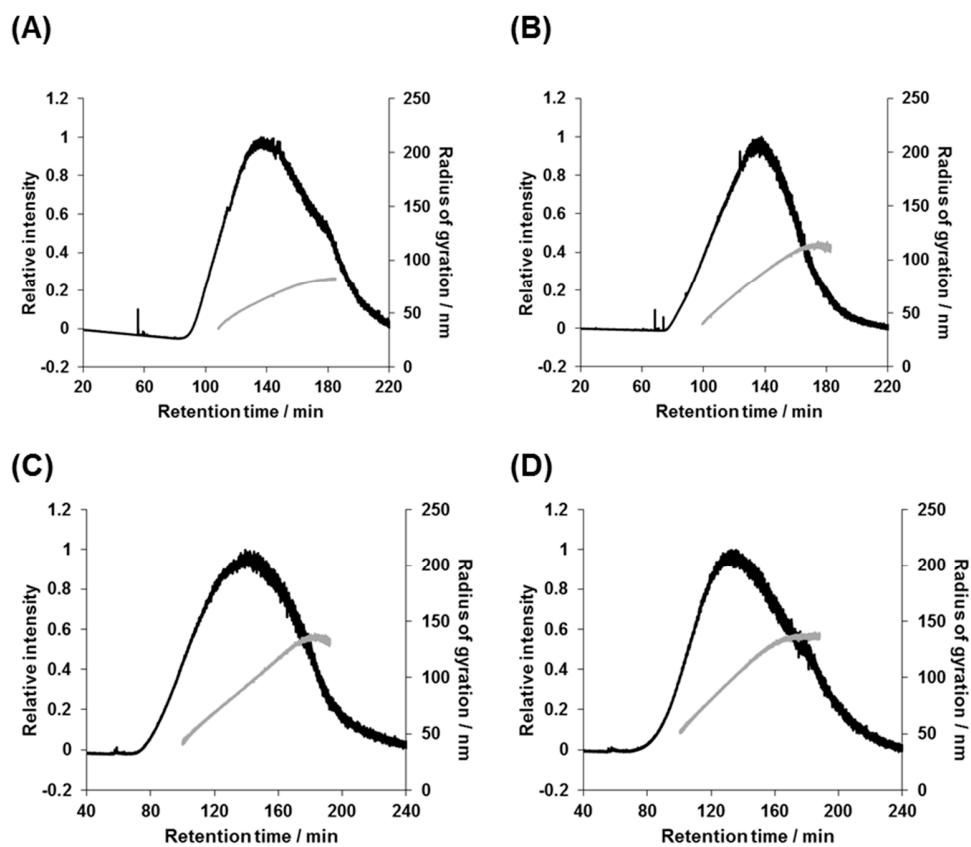

**Figure S4.** AF4 fractograms of (A) **1b**, (B) **2**, (C) **3**, and (D) **5** at a low flow rate ( $0.2 \text{ mL min}^{-1}$ ).

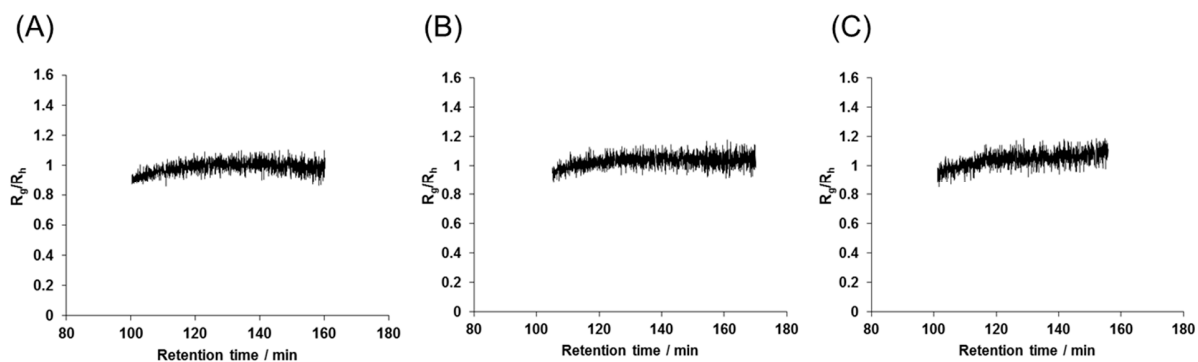

**Figure S5.** Structural characterization of the as-prepared polymersomes.  $R_g/R_h$  plots of (A) **2**, (B) **3**, and (C) **5**.

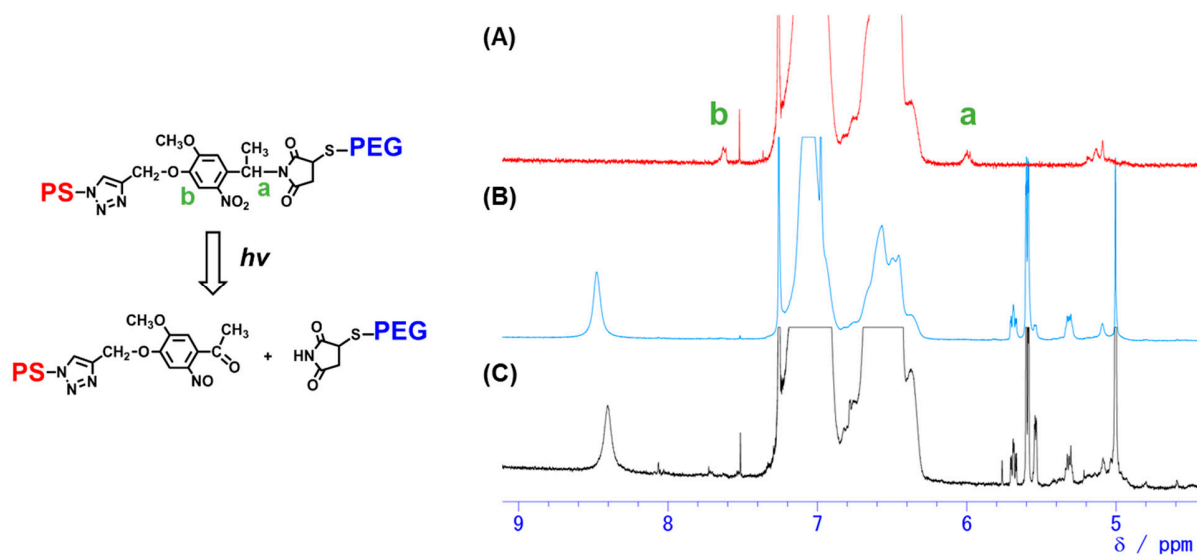

**Figure S6.**  $^1\text{H}$  NMR of **1b** in  $\text{CDCl}_3$  (A) before irradiation, and after irradiation for (B) 2 min and (C) 10 min.

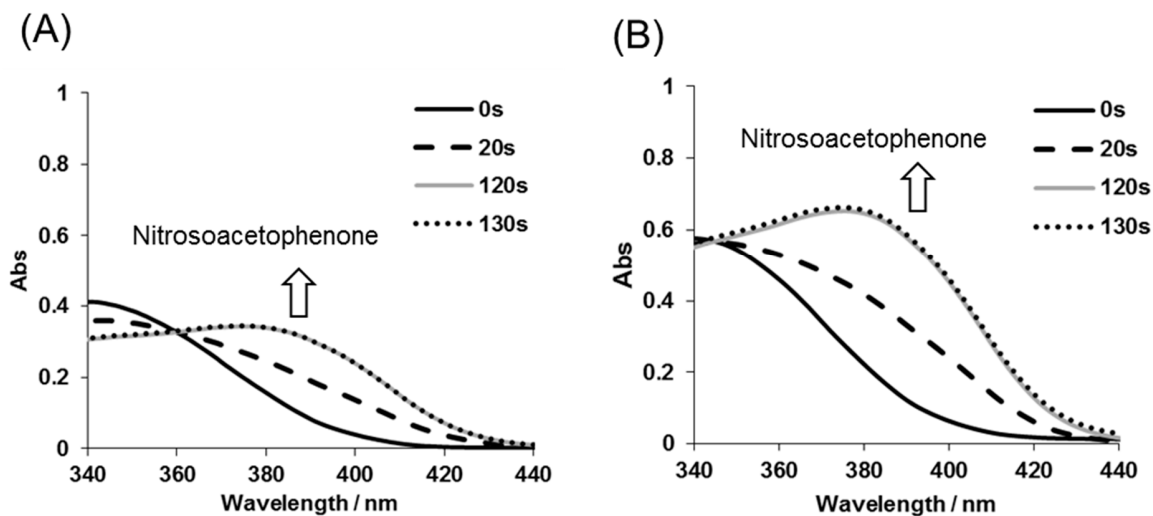

**Figure S7.** Changes in the UV spectra of photocleavable diblock copolymer (A) **1b** and (B) **4** upon photoirradiation in THF. The polymer solution (0.1 mM) was irradiated with near-UV light ( $\lambda > 320$  nm). Photolysis of the 2-nitrobenzyl ester was complete in 120 s, similar to the case of 2-nitrobenzylimide, because there were no further changes in the UV spectrum.

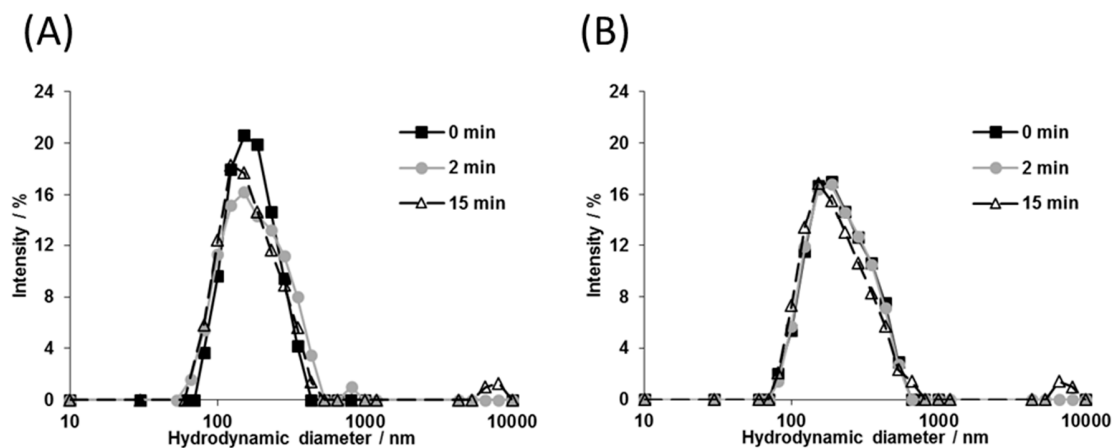

**Figure S8.** Structural changes of polymersomes in response to photoirradiation. (A-C) DLS results of polymersomes (A) **3** and (B) **4**, irradiated for 0 (■), 2 (gray, ◆), and 15 min (Δ).

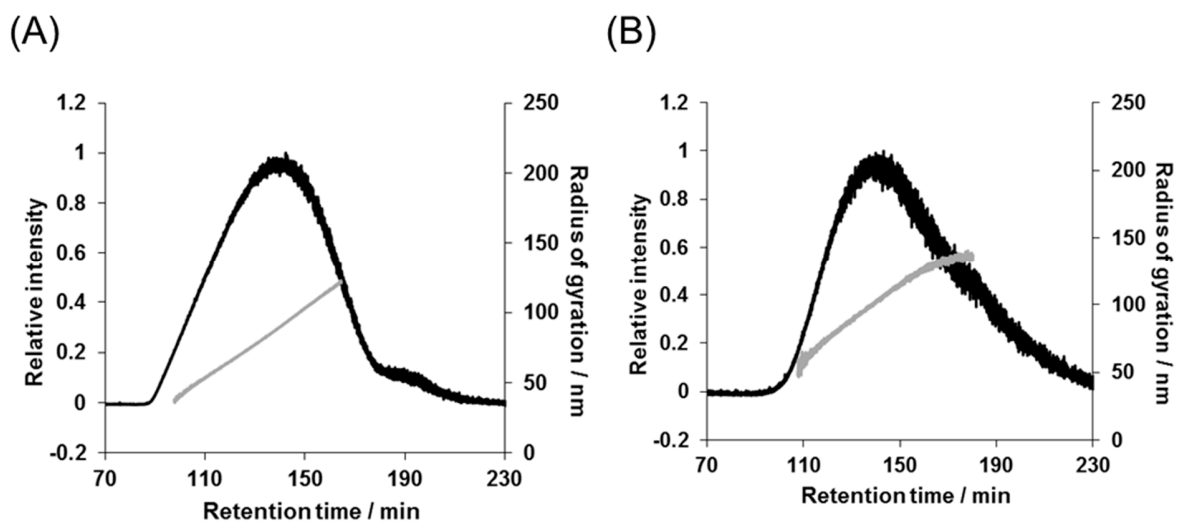

**Figure S9.** AF4 fractograms of polymersome (A) **3** and (B) **5** after irradiation for 15 min.

Table S1. Results of the payload releasing behaviors of entrapped fluorescein molecules from the polymersomes **1b** (NBIL type) and **4** (NBEL type) in dark without photoirradiation.

|        | % of fluorescein released |          |
|--------|---------------------------|----------|
|        | <b>1b</b>                 | <b>4</b> |
| 5 min  | 1.55                      | 1.29     |
| 10 min | 1.12                      | 1.69     |
